# Supplementary material for: Rice stripe virus utilizes a Laodelphax striatellus salivary carbonic anhydrase to facilitate plant infection by direct molecular interaction
Source: eLife journal article supplement (doi:10.7554/elife.88132), 2023-06-08
Supplement: fig1-data2 [file Figure1-D-Source data.pdf › Figure 1-source data 2/Figure1-D-Source data.pdf]

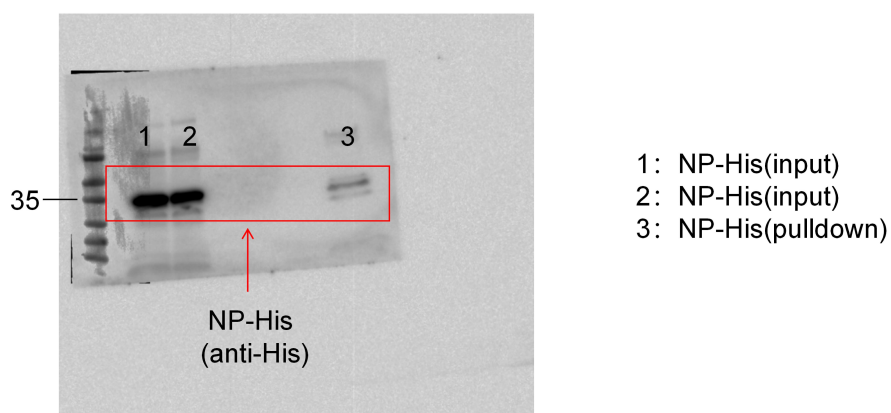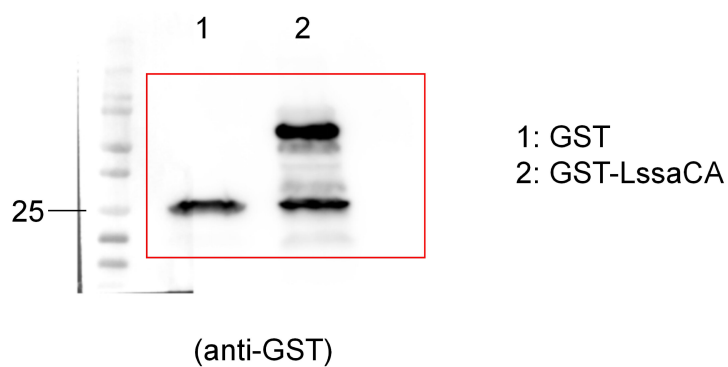

**Figure1-D-Source data 2.** Original membranes corresponding to Figure 1, panel D. Rainbow molecular weight markers were employed. Lane 1: GST co-incubated with NP-His. Lane 2: GST-LssaCA co-incubated with NP-His. Lane 3: GST-LssaCA co-incubated with NP-His. The antibodies used for detection are indicated on the figure.
