# Supplementary material for: Rice stripe virus utilizes a Laodelphax striatellus salivary carbonic anhydrase to facilitate plant infection by direct molecular interaction
Source: eLife journal article supplement (doi:10.7554/elife.88132), 2023-06-08
Supplement: fig1-data2 [file Figure1-G-Source data.pdf › Figure 1-source data 2/Figure1-G-Source data.pdf]

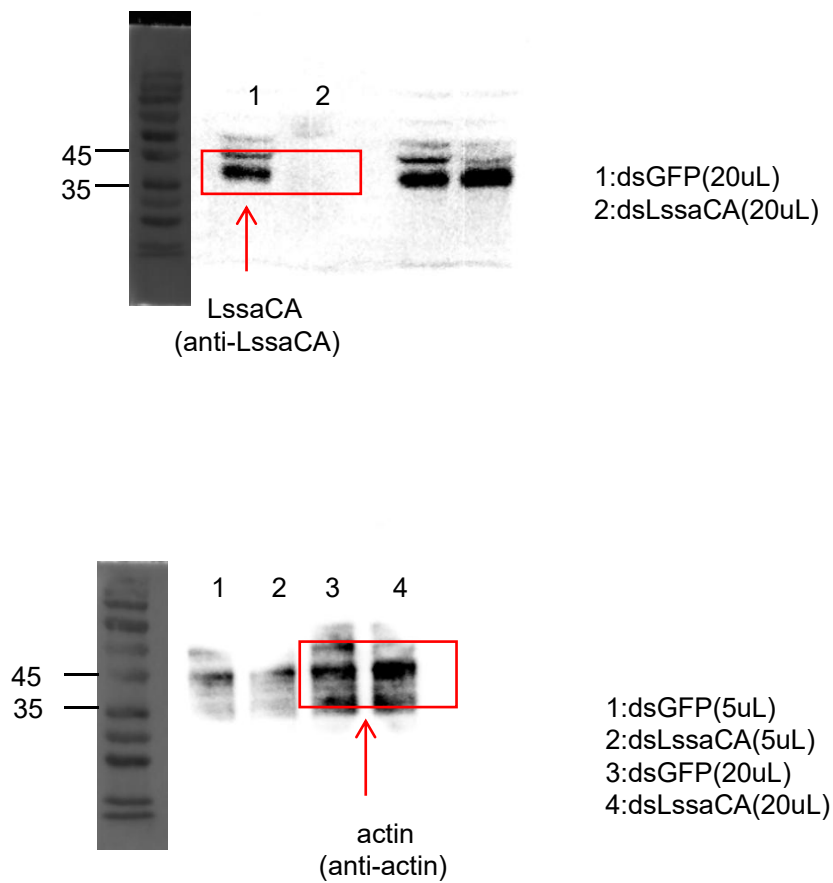

**Figure1-G-Source data 2.** Original membranes corresponding to Figure 1, panel G. Rainbow molecular weight markers were employed. Top:Detection of the target protein. Lane 1: dsGFP control; lane 2: dsLssaCA knockdown; lanes 3 & 4: samples unrelated to this experiment. Bottom: Corresponding  $\beta$ -actin loading control (lanes 3 & 4 match lanes 1 & 2 from the top panel). The antibodies used for detection are indicated on the figure.
