# Supplementary material for: Rice stripe virus utilizes a Laodelphax striatellus salivary carbonic anhydrase to facilitate plant infection by direct molecular interaction
Source: eLife journal article supplement (doi:10.7554/elife.88132), 2023-06-08
Supplement: fig1-data2 [file Figure1-H-Source data.pdf › Figure 1-source data 2/Figure1-H-Source data.pdf]

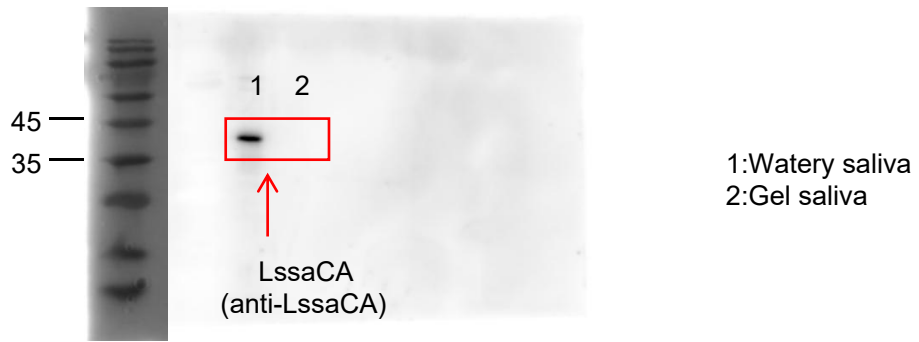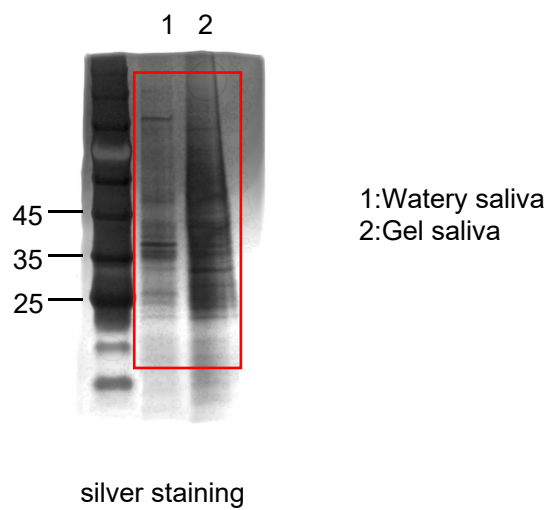

**Figure1-H-Source data 2.** Original membranes corresponding to Figure 1, panel H. Rainbow molecular weight markers were employed. Shown are the full-length Western blot(top)and corresponding silver-stained gel(bottom)of saliva protein from *Laodelphax striatellus*. Lanes: 1, Watery saliva; 2, Gel saliva. The antibodies used for detection are indicated on the figure.
