# Supplementary material for: Rice stripe virus utilizes a Laodelphax striatellus salivary carbonic anhydrase to facilitate plant infection by direct molecular interaction
Source: eLife journal article supplement (doi:10.7554/elife.88132), 2023-06-08
Supplement: fig1-data2 [file Figure1-J-Source data.pdf › Figure 1-source data 2/Figure1-J-Source data.pdf]

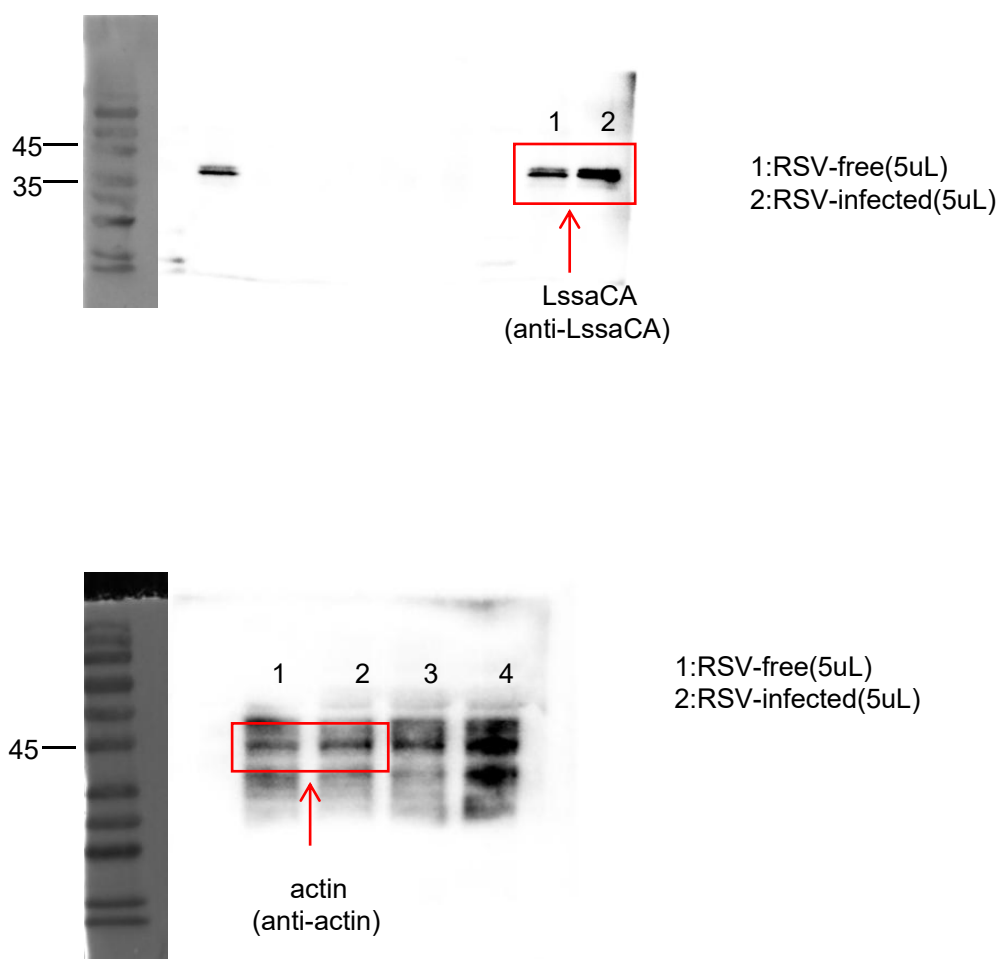

**Figure1-J-Source data 2.** Original membranes corresponding to Figure 1, panel J. Rainbow molecular weight markers were employed. Top: Detection of the target protein. Lane 1: RSV-free; lane 2: RSV-infected. Bottom: Corresponding  $\beta$ -actin loading control (lanes 1 & 2 match lanes 1 & 2 from the top panel). lanes 3 & 4: samples unrelated to this experiment. The antibodies used for detection are indicated on the figure.
