# Supplementary material for: Rice stripe virus utilizes a Laodelphax striatellus salivary carbonic anhydrase to facilitate plant infection by direct molecular interaction
Source: eLife journal article supplement (doi:10.7554/elife.88132), 2023-06-08
Supplement: fig1-figsupp3-data2 [file Figure1-supplement3-Source data.pdf › Figure 1-figure supplement 3-source data 2/Figure1-supplement3-Source data.pdf]

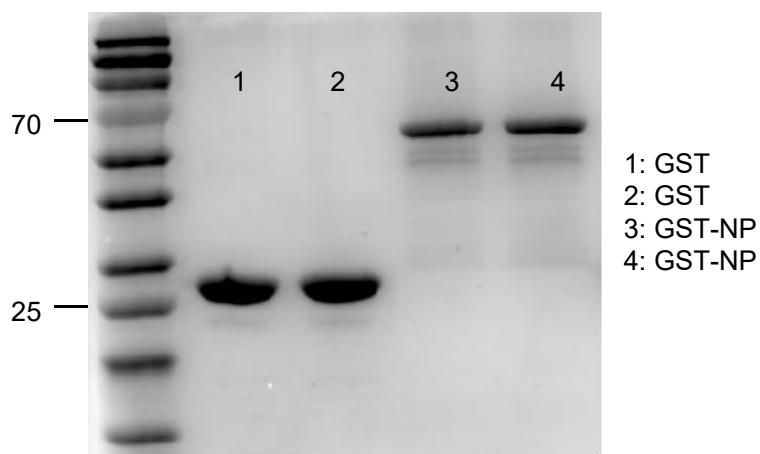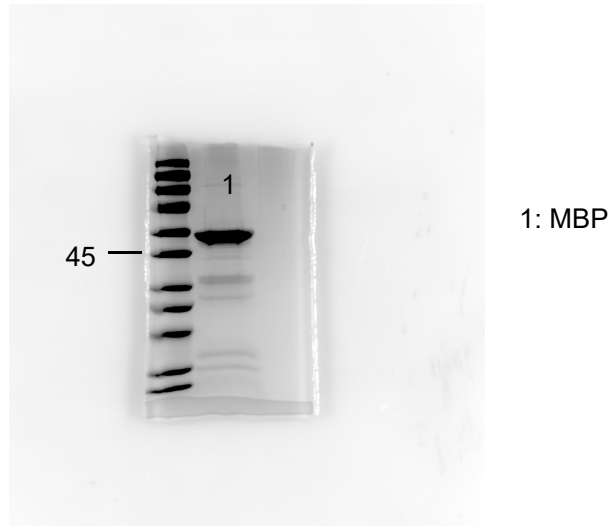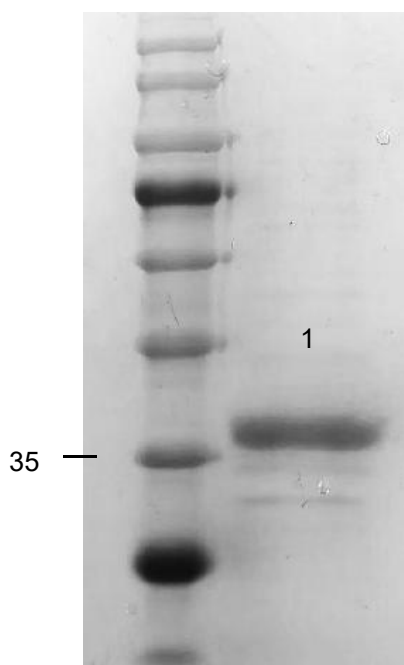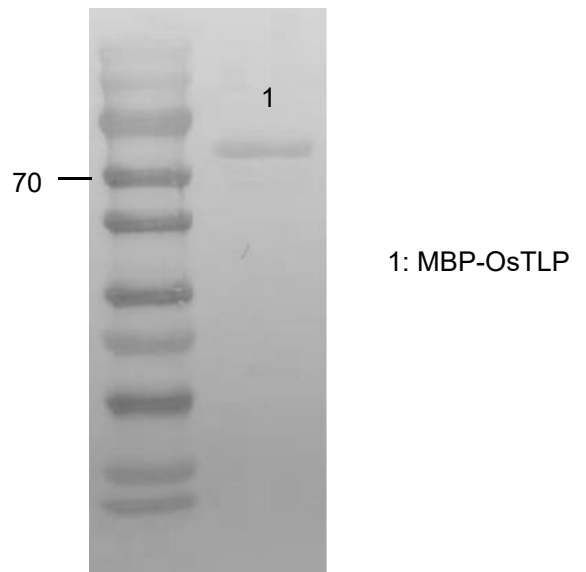

**Figure1-supplement3-Source data 2.** Original membranes corresponding to Figure 1, supplement3. Rainbow molecular weight markers were employed. Shown is a Coomassie brilliant blue-stained SDS-PAGE gel of purified recombinant proteins used in the MicroScale Thermophoresis (MST) assay.
