# Supplementary material for: Rice stripe virus utilizes a Laodelphax striatellus salivary carbonic anhydrase to facilitate plant infection by direct molecular interaction
Source: eLife journal article supplement (doi:10.7554/elife.88132), 2023-06-08
Supplement: fig2-data2 [file Figure2-I-Source data.pdf › Figure 2-source data 2/Figure2-I-Source data.pdf]

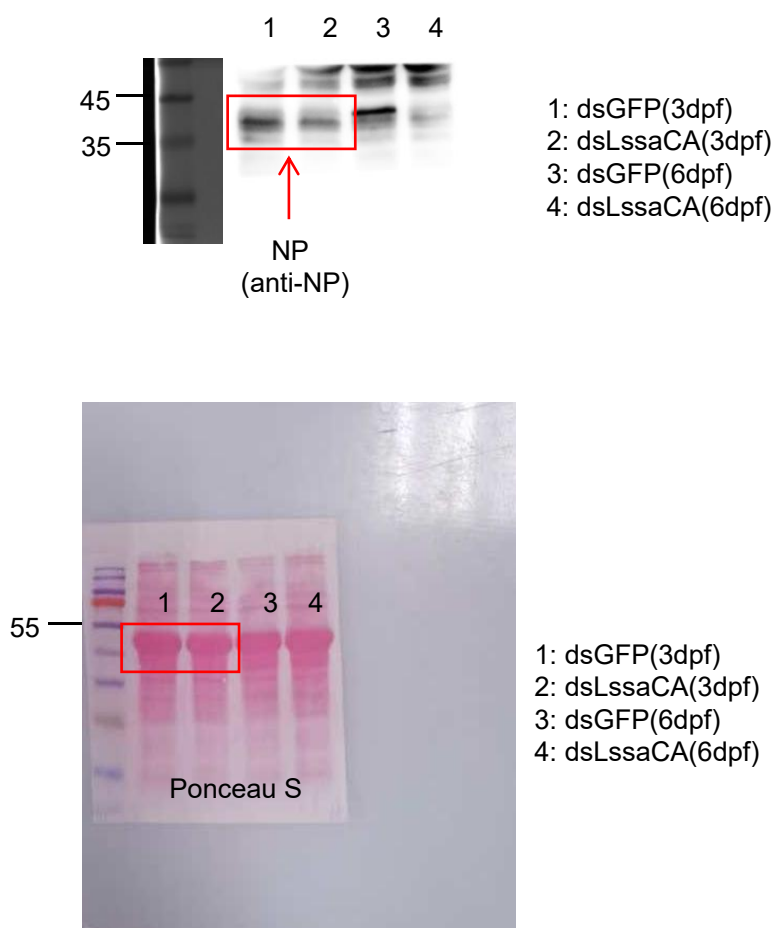

**Figure2-I-Source data 2.** Original membranes corresponding to Figure 2, panel I. Rainbow molecular weight markers were employed. Western blot of the target protein (top) and Ponceau S staining (bottom). RBCL as loading control. Only relevant lanes are shown: lane 1 (dsGFP, 3dpf) and lane 2 (dsLssaCA, 3dpf). Remaining lanes are not shown. The antibodies used for detection are indicated on the figure.
