# Supplementary material for: Rice stripe virus utilizes a Laodelphax striatellus salivary carbonic anhydrase to facilitate plant infection by direct molecular interaction
Source: eLife journal article supplement (doi:10.7554/elife.88132), 2023-06-08
Supplement: fig3-data2 [file Figure3-C-Source data.pdf › Figure 3-source data 2/Figure3-C-Source data.pdf]

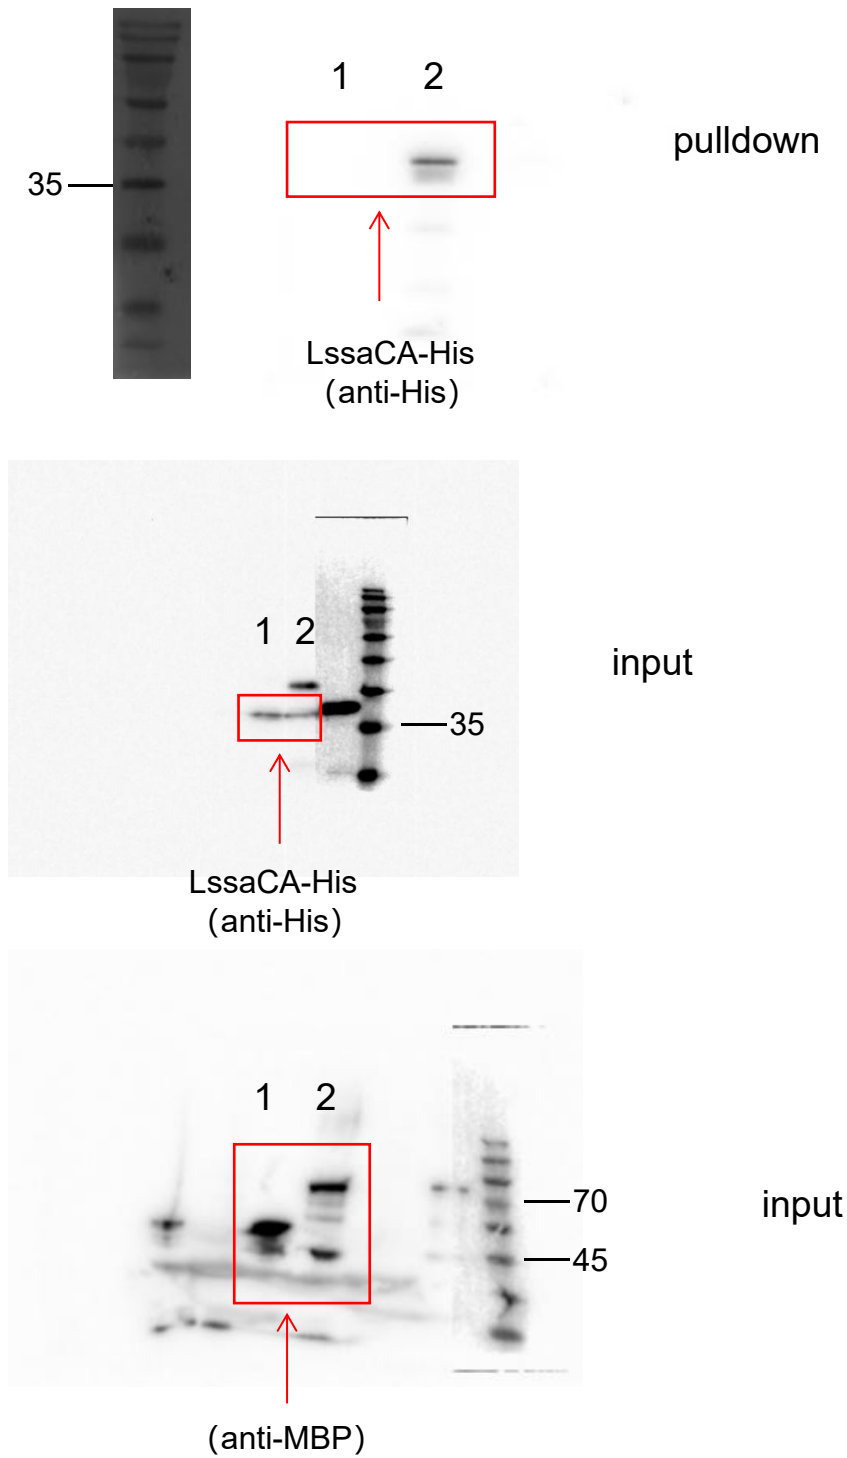

**Figure3-C-Source data 2.** Original membranes corresponding to Figure 3, panel C. Rainbow molecular weight markers were employed. Lane 1: MBP co-incubated with NP-His. Lane 2: MBP-OsTLP co-incubated with NP-His. The antibodies used for detection are indicated on the figure.
