# Supplementary material for: Rice stripe virus utilizes a Laodelphax striatellus salivary carbonic anhydrase to facilitate plant infection by direct molecular interaction
Source: eLife journal article supplement (doi:10.7554/elife.88132), 2023-06-08
Supplement: fig3-figsupp2-data2 [file Figure3-supplement2-Source data.pdf › Figure 3-figure supplement 2-source data 2/Figure3-supplement2-Source data.pdf]

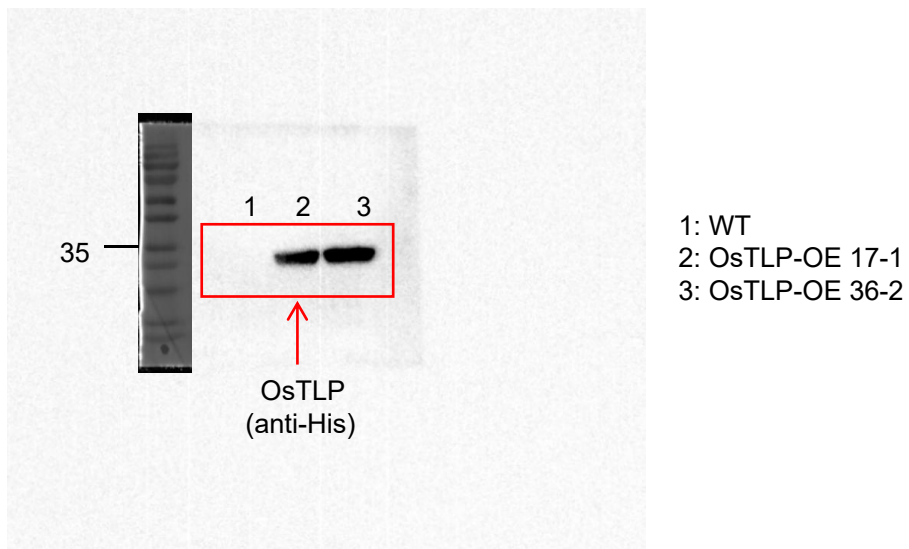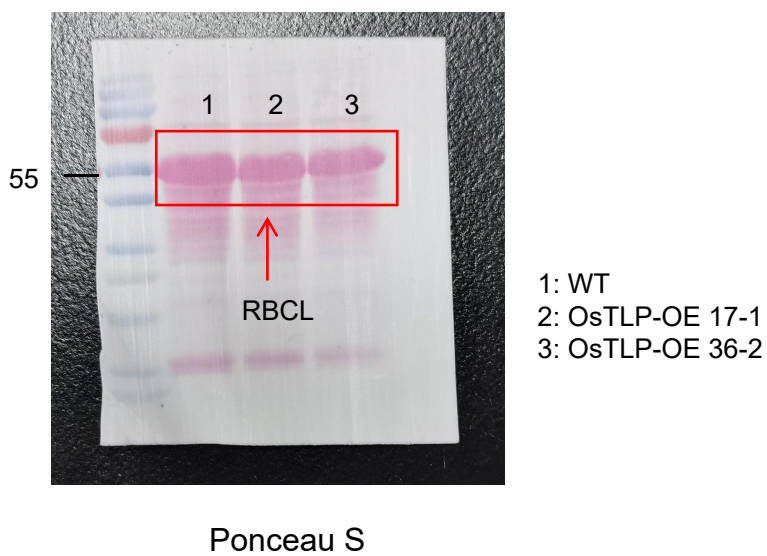

**Figure3-supplement2-Source data 2.** Original membranes corresponding to Figure 3, supplement2. Rainbow molecular weight markers were employed. Western blot of the target protein (top) and Ponceau S staining (bottom). RBCL as loading control. lane 1: WT; lane 2: OsTLP-OE 17-1; lane 3: OsTLP-OE 36-2. The antibodies used for detection are indicated on the figure.
