# Supplementary material for: Rice stripe virus utilizes a Laodelphax striatellus salivary carbonic anhydrase to facilitate plant infection by direct molecular interaction
Source: eLife journal article supplement (doi:10.7554/elife.88132), 2023-06-08
Supplement: fig4-data2 [file Figure4-A-Source data.pdf › Figure 4-source data 2/Figure4-A-Source data.pdf]

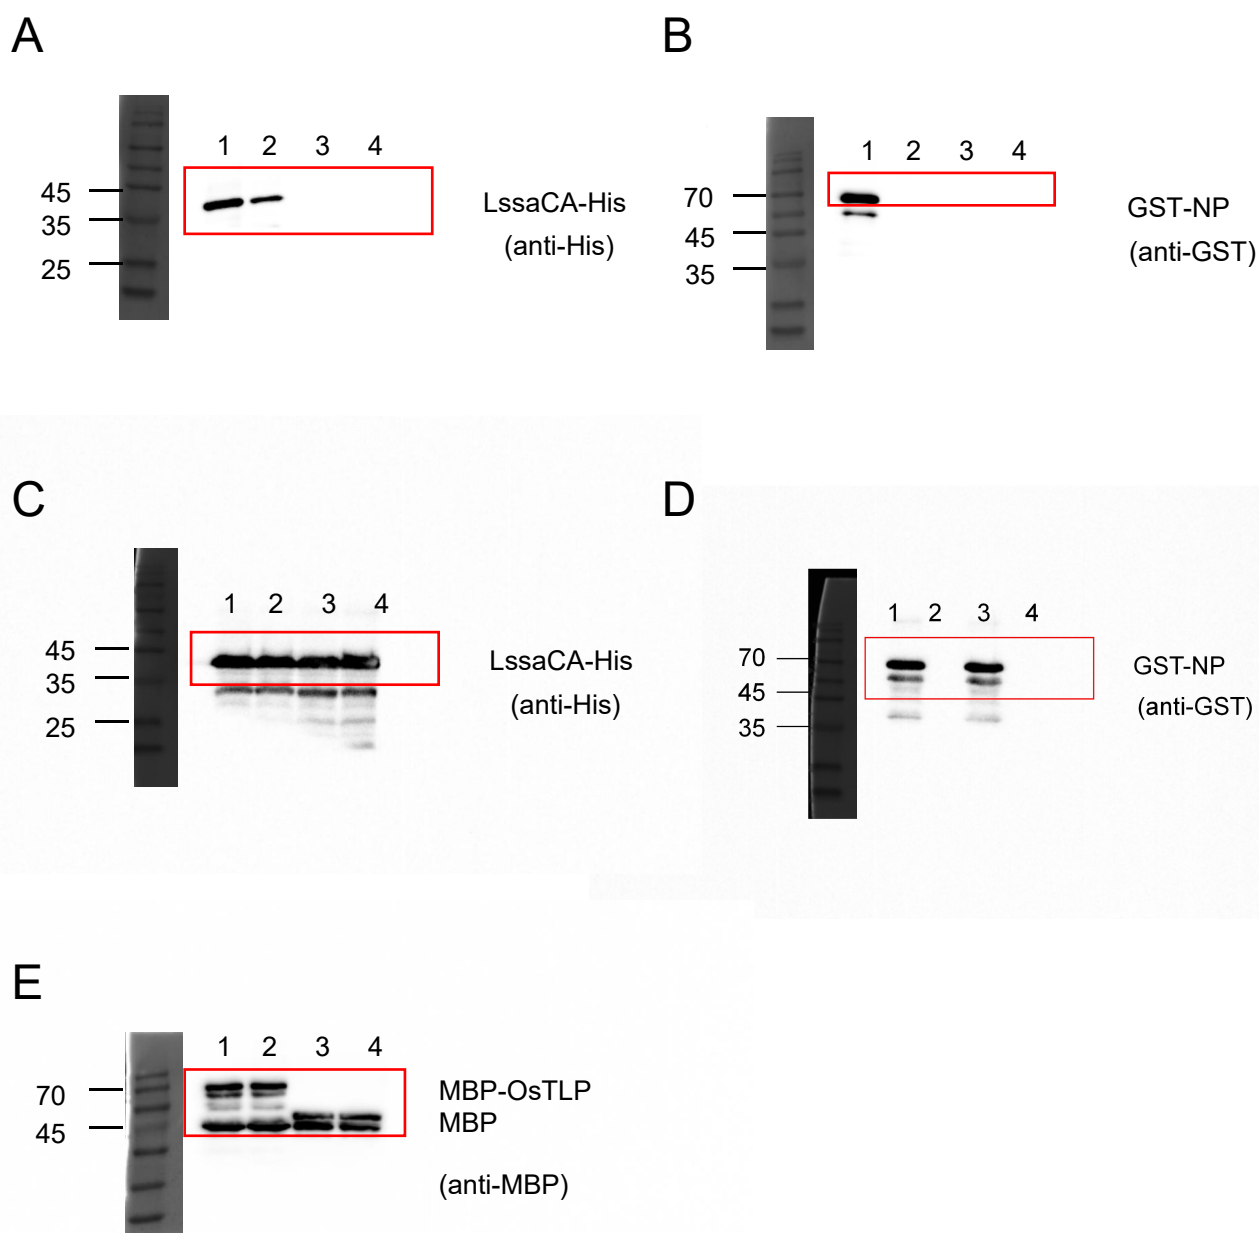

**Figure4-A-Source data 2.** Original membranes corresponding to Figure 4, panel A. Rainbow molecular weight markers were employed. Lane 1: MBP-OsTLP and LssaCA-His, co-incubated with GST-NP. Lane 2: MBP-OsTLP co-incubated with LssaCA-His. Lane 3: MBP and LssaCA-His, co-incubated with GST-NP. Lane 4: MBP co-incubated with LssaCA-His. The antibodies used for detection are indicated on the figure.
