# Supplementary material for: Rice stripe virus utilizes a Laodelphax striatellus salivary carbonic anhydrase to facilitate plant infection by direct molecular interaction
Source: eLife. 2026 Jan 6;12:RP88132. doi: 10.7554/eLife.88132 (PMC12774414; doi:10.7554/eLife.88132)
Supplement: Supplementary file 1. [file elife-88132-supp1.xlsx]

## Sheet: Sheet1
Supplementary File 1
Position	Amino acid	Replaced amino acid
111	His	Asp
139	Asn	His
141	His	Asp
143	His	Asp
153	Glu	His
166	His	Asp
253	Thr	Asn
