# Supplementary material for: Rice stripe virus utilizes a Laodelphax striatellus salivary carbonic anhydrase to facilitate plant infection by direct molecular interaction
Source: eLife. 2026 Jan 6;12:RP88132. doi: 10.7554/eLife.88132 (PMC12774414; doi:10.7554/eLife.88132)
Supplement: Supplementary file 2. [file elife-88132-supp2.xlsx]

## Sheet: Sheet2 (2)
Supplementary File 2
Line	OsTLP sequence	Editing
WT	GGACTGTGGCTCGGGTGGCATC	/
ostlp#3	GGACTGTGGCT - GGGTGGCATC	-1
ostlp#5	GGACTGTGGC - - GGGTGGCATC	-2
