# Supplementary material for: Rice stripe virus utilizes a Laodelphax striatellus salivary carbonic anhydrase to facilitate plant infection by direct molecular interaction
Source: eLife. 2026 Jan 6;12:RP88132. doi: 10.7554/eLife.88132 (PMC12774414; doi:10.7554/eLife.88132)
Supplement: Supplementary file 3. [file elife-88132-supp3.xlsx]

## Sheet: Sheet3
Supplementary File 3
Group ID	Protein description
1	superoxide dismutase-like protein
2	thaumatin-like protein 1b isoform X1
3	mediator of RNA polymerase II transcription subunit 30
4	Bowman-Birk type bran trypsin inhibitor
