# Supplementary material for: Rice stripe virus utilizes a Laodelphax striatellus salivary carbonic anhydrase to facilitate plant infection by direct molecular interaction
Source: eLife. 2026 Jan 6;12:RP88132. doi: 10.7554/eLife.88132 (PMC12774414; doi:10.7554/eLife.88132)
Supplement: Supplementary file 4. [file elife-88132-supp4.xlsx]

## Sheet: Sheet4
Supplementary File 4
Primer name	Primer sequence (5’-3’)
LssaCA-T7F	TAATACGACTCACTATAGGTACCAAGAAGTGAGGCGAGAC
LssaCA-T7R	TAATACGACTCACTATAGGAGAACCTGGGTATGCGAAGTA
GFP-T7F	TAATACGACTCACTATAGGATGGTAGATCTGACTAGTAA
GFP-T7R	TAATACGACTCACTATAGGCTAGTCATCTGCACCTTCTG
LssaCA-q-F	CAGCAGTCGCCTATCGACATT
LssaCA-q-R	TCGCCTCACTTCTTGGTACTTTC
actin-q-F	AGGAAGGCTGGAAGAGGACC
actin-q-R	CGGGAAATTGTGAGGGACAT
EF2-q-F	GTCTCCACGGATGGGCTTT
EF2-q-R	ATCTTGAATTTCTCGGCATACATTT
NP-q-F	GATGCGTTGTCTTACCTGACTGC
NP-q-R	CACTATCCCATACCTCGACACCA
OsGSL3-q-F	TGGCAAGCGACCACATAG
OsGSL3-q-R	AGACCTTAGCACGGACTG
OsGSL4-q-F	TGCTTTGAGTGGCACAAGAC
OsGSL4-q-R	CTGAAACTCGGAGACGAAGG
OsGSL5-q-F	GTGGTGTCCCTGCTATGA
OsGSL5-q-R	GTTGTTTGCTATTCTCCC
OsGSL10-q-F	TGGCAGCTGTGTTCTTTACG
OsGSL10-q-R	CCCATCCGGAAGGTAAGAAT
OsTLP-F	GAGAACACGGGGGACTCTAGAATGTCACAGTGCCCAACTCATG
OsTLP-R	ACCATGGTGGCTAGCCCGGATCCGAAAGCCAGTGCAGGCTTGG
LssaCA-F-BamHI	CATGGAGGCCGAATTCATGGAGCTGTTATTCCACATA
LssaCA-R-EcoRI	GCAGGTCGACGGATCCTACATCATTGGTTGCCTCGGCTTG
OsTLP-F-1300	GAGAACACGGGGGACTCTAGAATGTCACAGTGCCCAACTCATG
OsTLP-R-1300	ACCATGGTGGCTAGCCCGGATCCGAAAGCCAGTGCAGGCTTGG
OsTLP-MBP-F	GAGGGAAGGATTTCAGAATTCATGTCACAGTGCCCAACTCATG
OsTLP-MBP-R	CAGTGCCAAGCTTGCCTGCAGGAAAGCCAGTGCAGGCTTGG
OsTLP-pDBleu-F	ATCGTCGAGGTCGACCCCCGGGATGTCACAGTGCCCAACTCATG
OsTLP-pDBleu-R	CGGCCGCACTAGTTGCCATGGGATCATGGCGGCAACGAG
LssaCA-pPC86-F	AGAGGGTGGGTCGACCCCCGGGATGGAGCTGTTATTCCACATAAGCA
LssaCA-pPC86-R	CGCACTAGTAGATCTGGAATTCTACATCATTGGTTGCCTCGGC
